# Supplementary material for: Neonatally imprinted stromal cell subsets induce tolerogenic dendritic cells in mesenteric lymph nodes
Source: PubMed Central journal article supplement (PMC6156403; doi:10.1038/s41467-018-06423-7), 2018-09-25
Supplement: 41467_2018_6423_MOESM3_ESM.pdf [file 41467_2018_6423_MOESM3_ESM.pdf]

## Supplementary Tables legends

**Supplementary Table 1:** DEGs between mLN- and pLN-derived FSCs independent of microbial colonization. CD45<sup>+</sup>Ter119<sup>-</sup>CD31<sup>-</sup>gp38<sup>+</sup> FSCs were isolated from mLNs and pLNs of GF or SPF mice, and RNA-seq and subsequent analysis was performed. DEGs were identified in colonization (SPF vs. GF)- and location (mLNs vs. pLNs)-dependent pairwise comparisons ( $|\log_2(\text{FC})| \geq 1$  and  $q$  value  $\leq 0.05$ ). DEG, differentially expressed gene; GF, germ-free; FC, foldchange; mLN, mesenteric lymph node; pLN, peripheral skin-draining lymph node; RPKM, reads per kilobase of exon length per million mapped reads; SPF, specific pathogen-free.

**Supplementary Table 2:** mLN-specific transcriptional signature maintained in FSCs from transplanted mLN-SPF. CD45<sup>+</sup>CD24<sup>-</sup>CD31<sup>-</sup>gp38<sup>+</sup> FSCs were isolated from endogenous mLN- and pLN-SPF, transplanted pLN- and mLN-SPF or transplanted mLN-GF. RNA-seq<sup>+</sup> and subsequent analysis was performed. Table summarizes DEGs ( $|\log_2(\text{FC})| \geq 1$  and  $q$ -value  $\leq 0.05$ ) persistently up- or down-regulated in FSCs from transplanted mLN-SPF when compared to FSCs from transplanted pLN-SPF as well as endogenous mLN-SPF and pLN-SPF.

**Supplementary Table 3:** Transcriptional signature genes per stromal cell subset. Single cell suspensions from mLN-SPF and pLN-SPF were sorted for CD24<sup>-</sup>CD45<sup>-</sup> cells and subjected to scRNA-seq. FSCs were identified as non-LECs, non-BECs as well as Pecam1<sup>-</sup> and Ackr4<sup>-</sup>. Table summarizes marker DEGs up-regulated for each cluster. pct.1, percent of cells expressing gene in respective cluster; pct.2, percent of cells expressing gene in respective reference (1 = 100 %).

**Supplementary Table 4:** Transcriptional signature genes per mLN-SPF stromal cell subset. Single cell suspensions from mLN-SPF were sorted for CD24<sup>-</sup>CD45<sup>-</sup> cells and subjected to scRNA-seq. FSCs were identified as non-LECs, non-BECs as well as Pecam1<sup>-</sup> and Ackr4<sup>-</sup>. Table summarizes marker DEGs up-regulated for each cluster. pct.1, percent of cells expressing gene in respective cluster; pct.2, percent of cells expressing gene in respective reference (1 = 100 %).

**Supplementary Table 5:** Transcriptional signature genes per pLN-SPF stromal cell subset. Single cell suspensions from pLN-SPF were sorted for CD24<sup>-</sup>CD45<sup>-</sup> cells and subjected to scRNA-seq. FSCs were identified as non-LECs, non-BECs as well as Pecam1<sup>-</sup> and Ackr4<sup>-</sup>. Table summarizes marker DEGs up-regulated for each cluster. pct.1, percent of cells expressing gene in respective cluster; pct.2, percent of cells expressing gene in respective reference (1 = 100 %).
